# Supplementary material
Source: publisher figshare collection journal article supplement (https://acs.figshare.com/ndownloader/files/3611565)
Supplement: Supplementary file 1 [file 3611565]

# Supporting Information

## **Demulsification of oleic acid-coated magnetite nanoparticles for cyclohexane-in-water nanoemulsions**

Jiling Liang <sup>a</sup>, Haiping Li <sup>b</sup>, Jingen Yan <sup>c</sup>, Wanguo Hou <sup>a, d</sup> \*

<sup>a</sup> Environment Research Institute, Shandong University, Jinan 250100, P.R. China.

<sup>b</sup> National Engineering Technology Research Center for Colloidal Materials,  
Shandong University, Jinan 250100, P.R. China

<sup>c</sup> Gudong Oil Production Factory, Shengli Oilfield Company, SINOPEC, Dongying  
257237, P.R. China

<sup>d</sup> Key Laboratory of Colloid & Interface Chemistry (Ministry of Education),  
Shandong University, Jinan 250100, P.R. China.

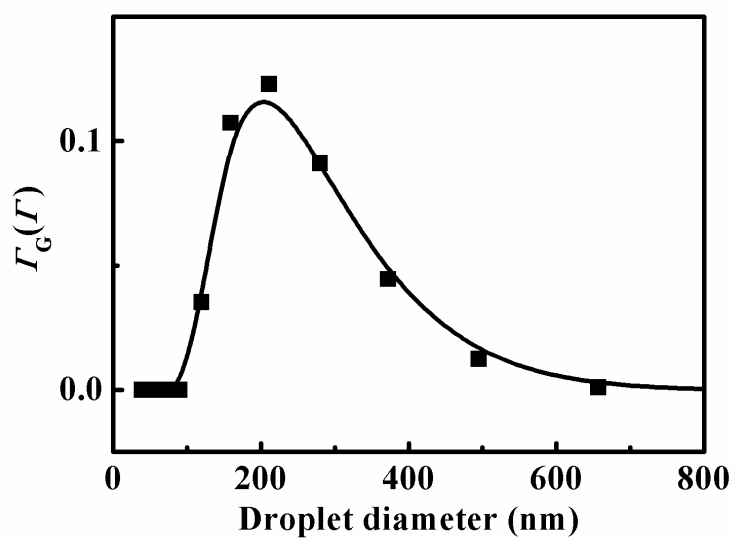

**Fig. S1** Droplet size distributions of cyclohexane-in-water nanoemulsions. †

† The size distribution of nanoemulsions was determined by dynamic laser light scattering (DLS) at 25.0 °C using a BI-200SM laser light scattering instrument (Brookhaven Co., USA) with an argon laser of 488 nm at a scattering angle of 90 °. The data measured by DLS were analyzed through the Contin method.

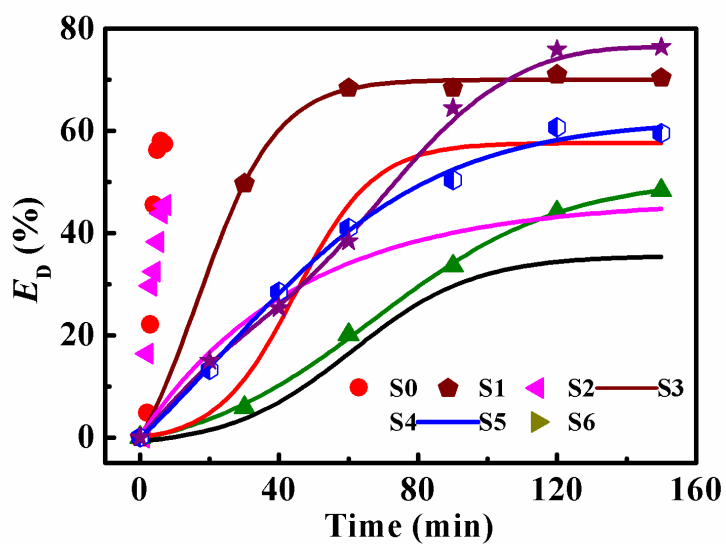

**Fig. S2** Plots of demulsification efficiency ( $E_D$ ) vs. time at  $C_S = 10.0 \text{ g}\cdot\text{L}^{-1}$ .

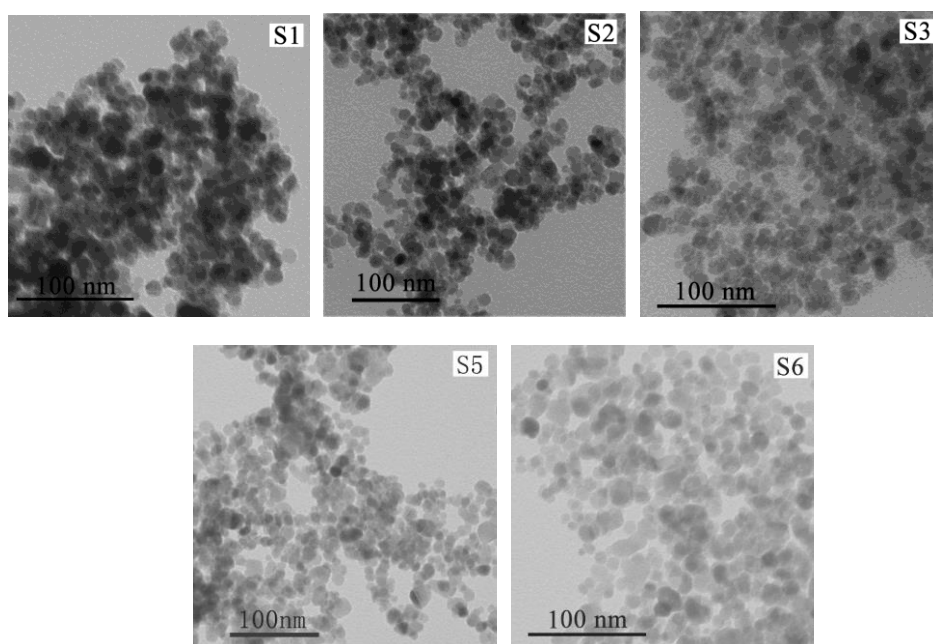

Fig. S3 TEM images of  $\text{Fe}_3\text{O}_4\text{@OA}$  nanoparticles.

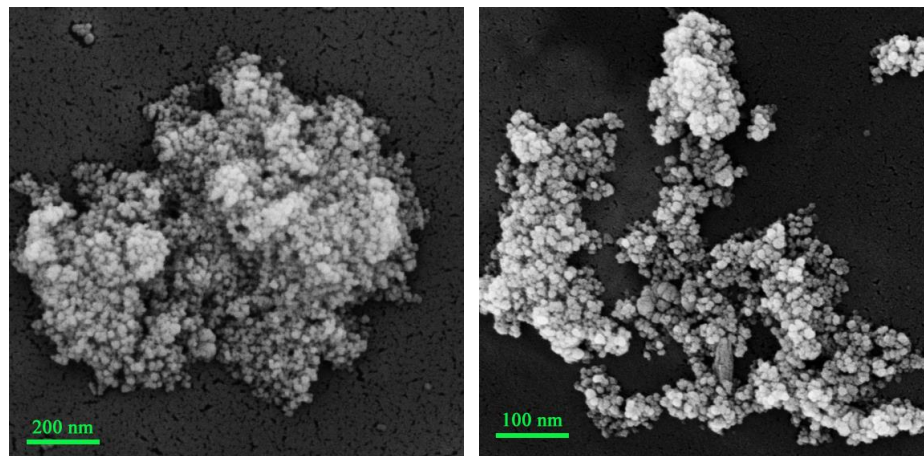

**Fig. S4** SEM images of magnetic  $\text{Fe}_3\text{O}_4\text{@OA}$  nanoparticles of sample S4. ††

†† The scanning electron microscopy (SEM) images were observed using a Supra55 FE-SEM (Carl Zeiss Co., Germany)

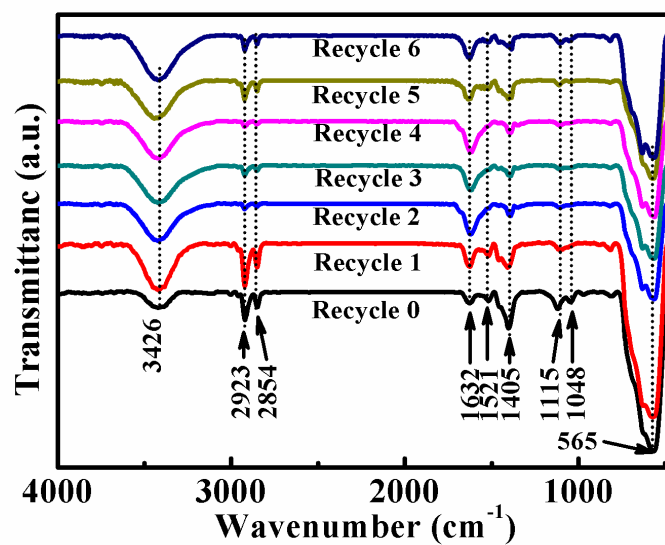

**Fig. S5** FT-IR spectra of S4 sample recovered in Recycling tests.

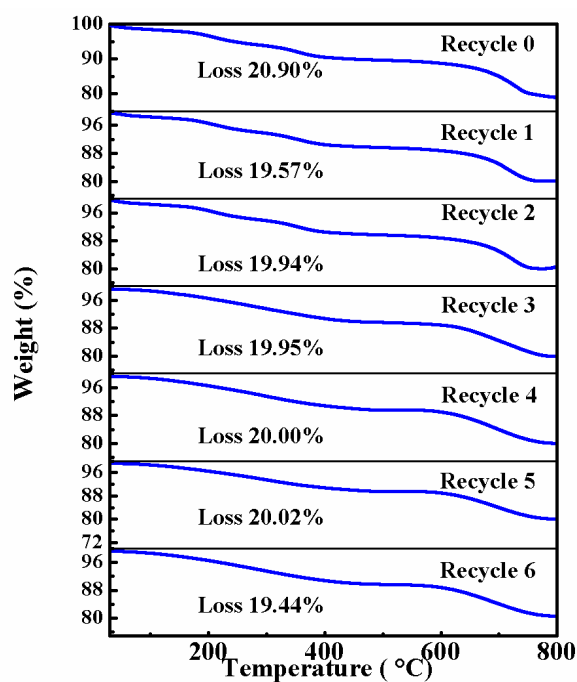

**Fig. S6** TG curves of S4 sample recovered in Recycling tests.

**Table S1** Dispersibility of magnetic nanoparticles in different solvents†††

| Sample                              | Cyclohexane   | Acid aqueous solution<br>(pH=6.3) | Alkaline aqueous solution<br>(pH=11.5) |
|-------------------------------------|---------------|-----------------------------------|----------------------------------------|
| Bare Fe <sub>3</sub> O <sub>4</sub> | Precipitation | Dispersion                        | Dispersion                             |
| S1                                  | Precipitation | Dispersion                        | Dispersion                             |
| S2                                  | Precipitation | Dispersion                        | Dispersion                             |
| S3                                  | Dispersion    | Precipitation                     | Precipitation                          |
| S4                                  | Dispersion    | Precipitation                     | Precipitation                          |
| S5                                  | Dispersion    | Precipitation                     | Precipitation                          |
| S6                                  | Dispersion    | Precipitation                     | Precipitation                          |

††† The dispersibility of magnetic nanoparticles was qualitatively measured through dispersing them into cyclohexane, acid aqueous solution (pH =6.3) and alkaline aqueous solution (pH =11.5).
